# Supplementary material
Source: publisher figshare collection journal article supplement (https://acs.figshare.com/ndownloader/files/5767605)
Supplement: Supplementary file 1 [file 5767605]

REVISED

MAR 07 2000

**Supporting Information:**

Absolute Reactivity of the 4-Methoxycumyl Cation in Non-Acid Zeolites.

Melanie A. O'Neill, Frances L. Cozens\* and Norman P. Schepp

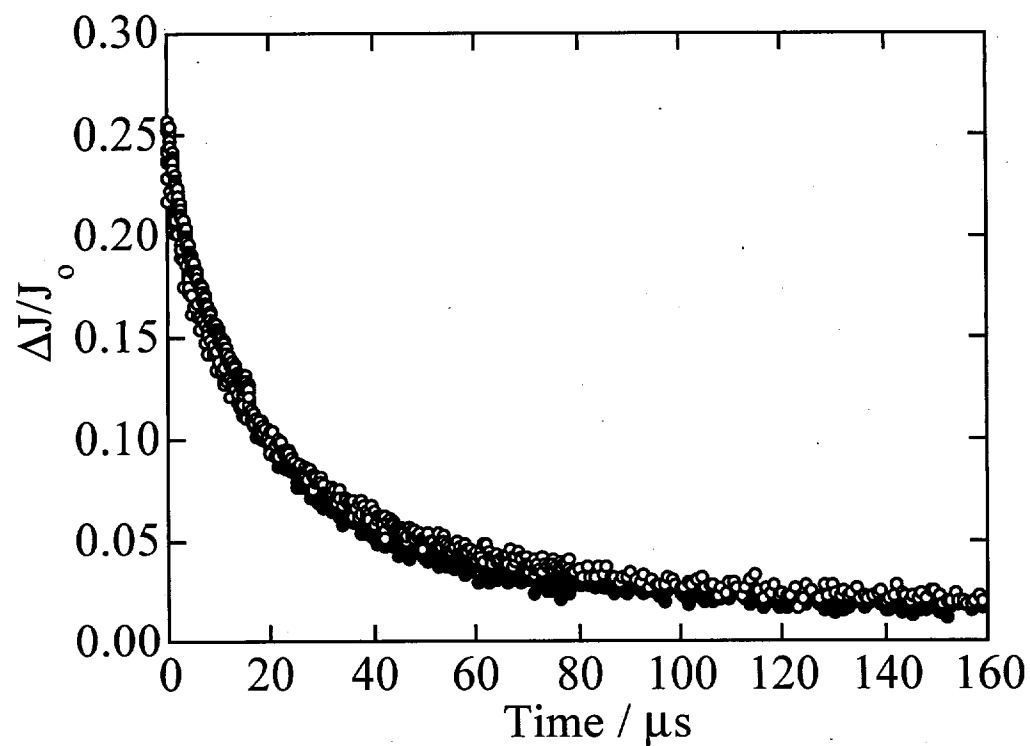

Figure S1. Decay kinetics at 360-nm for the 4-methoxycumyl cation (open circles) and 4-methoxycumyl cation- $d_6$  (closed circles) in dry LiY.

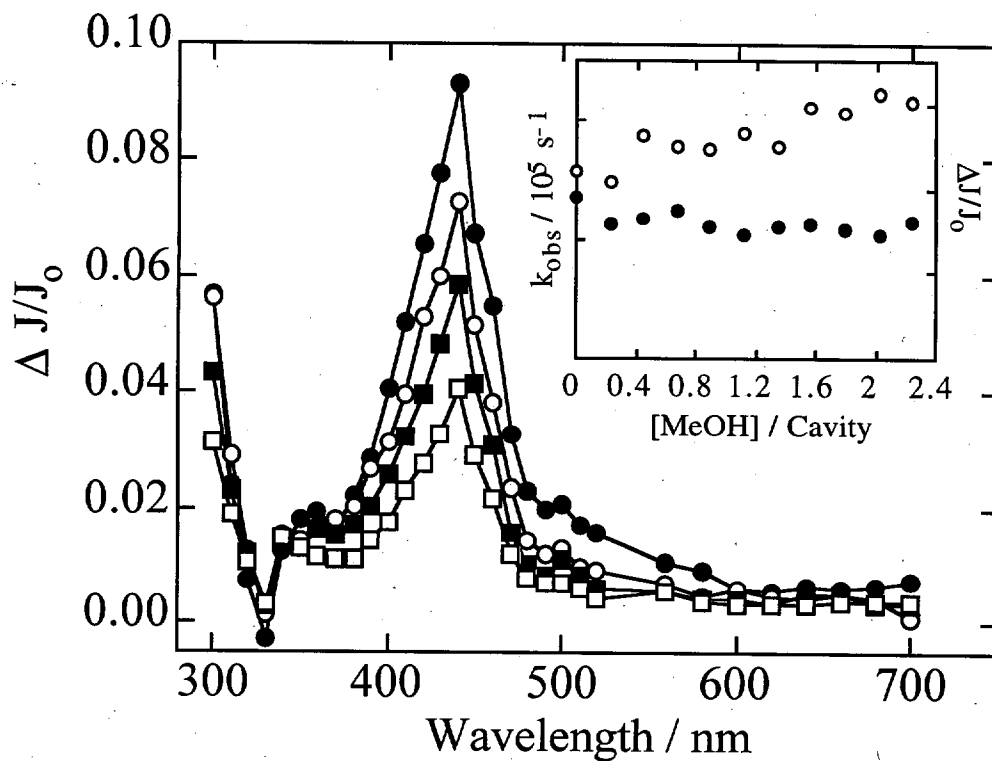

Figure S2. Transient diffuse reflectance spectrum generated upon 266-nm laser irradiation of 4-methoxytoluene in NaY. The spectra were taken 480 ns (closed circles), 1.84  $\mu$ s (open circles), 4.80  $\mu$ s (closed squares) and 14.4  $\mu$ s (open squares) after the laser pulse. Inset shows the observed rate constant for the decay (closed circles) and initial absorption (open circles) at 420 nm as a function of methanol concentration.

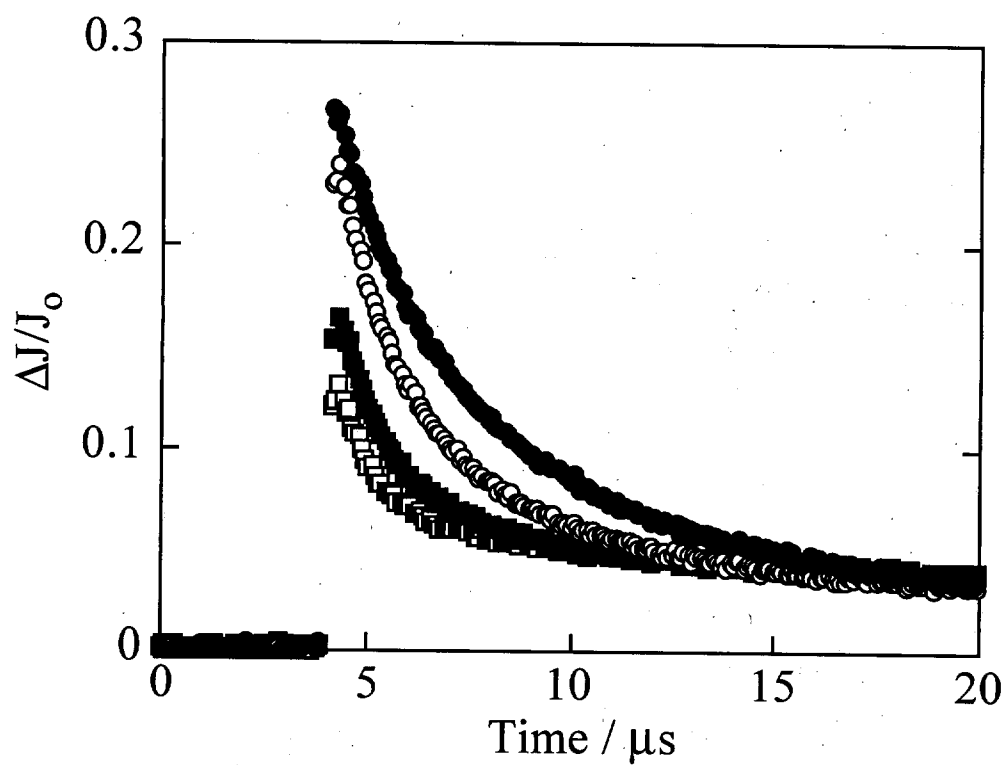

Figure S3. Decay of the 4-methoxycumyl cation at 360 nm in NaY containing one (closed circles), three (open circles), six (closed squares), and nine (open squares)  $\mu L$  of coadsorbed methanol in 119 mg of NaY.

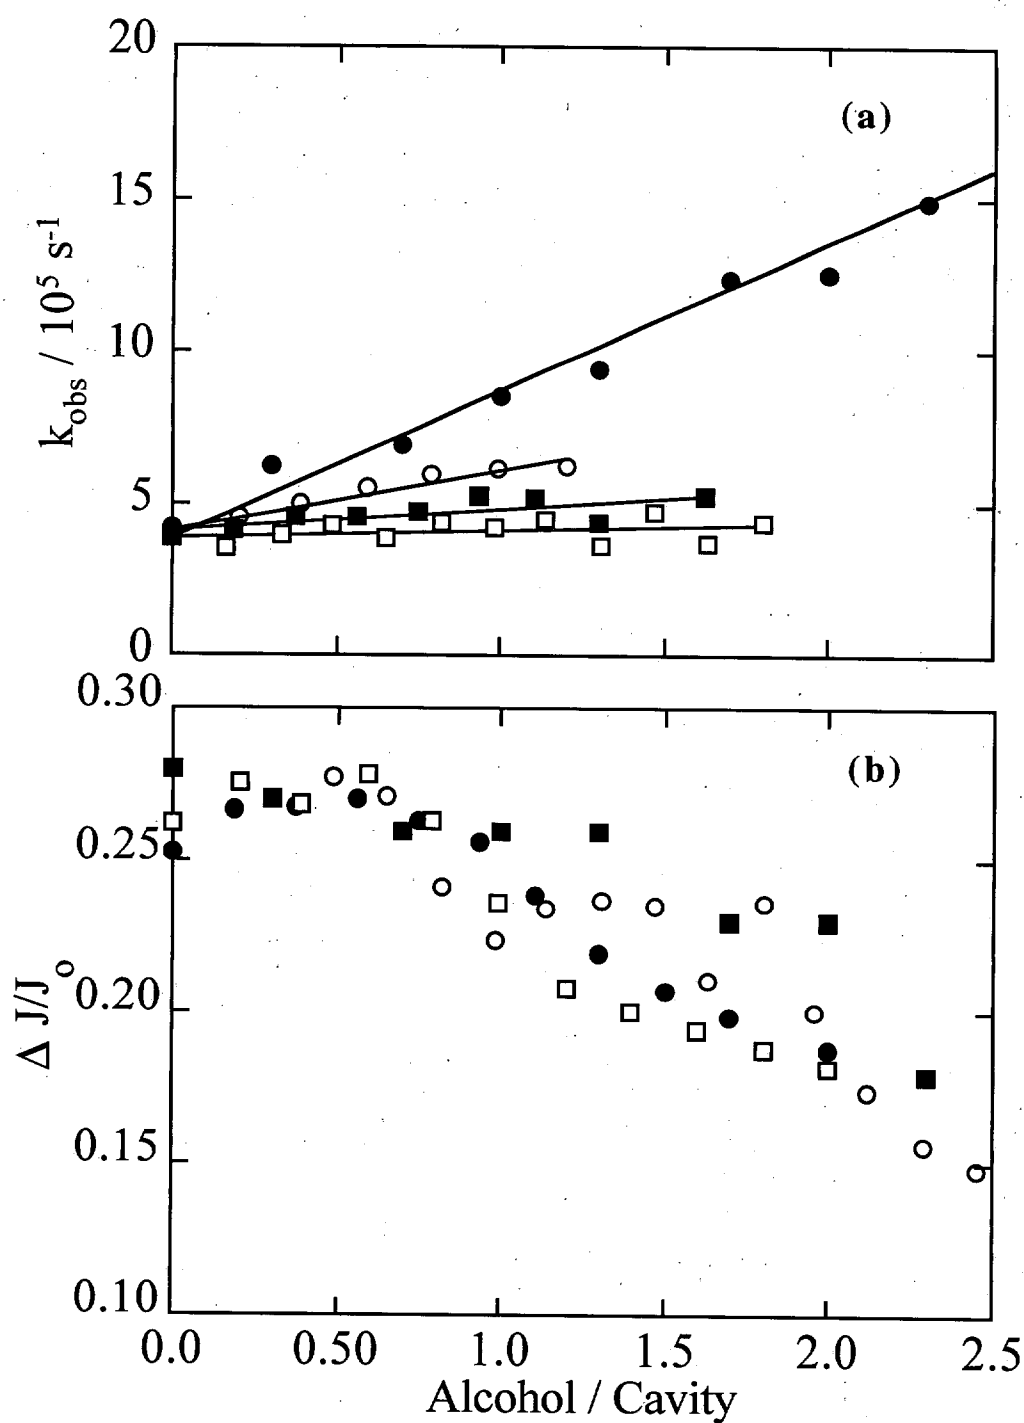

Figure S4. Relationship between (a) the observed rate constant for decay and (b) the initial absorption at 360 nm for the 4-methoxycumyl cation in NaY and the concentration of methanol (closed circles), ethanol (open circles), 2-propanol (closed squares) and *t*-butanol (open squares).
